# Supplementary material for: Antimicrobial activity of aroylhydrazone-based oxido vanadium(v) complexes: in vitro and in silico studies
Source: Royal Society of Chemistry journal article supplement (doi:10.1039/c5nj02594j), 2016-01-01
Supplement: c5nj02594j1.pdf [file c5nj02594j1.pdf]

*Supplementary material*

**Antimicrobial activity of aroylhydrazone-based oxido vanadium(V)  
complexes: *in-vitro* and *in silico* studies**

S. Yousef Ebrahimipour\*, Iran Sheikhshoae, Jim Simpson, Hadi Ebrahimnejad, Michal Dusek,  
Nima Kharazmi, Vaclav Eigner

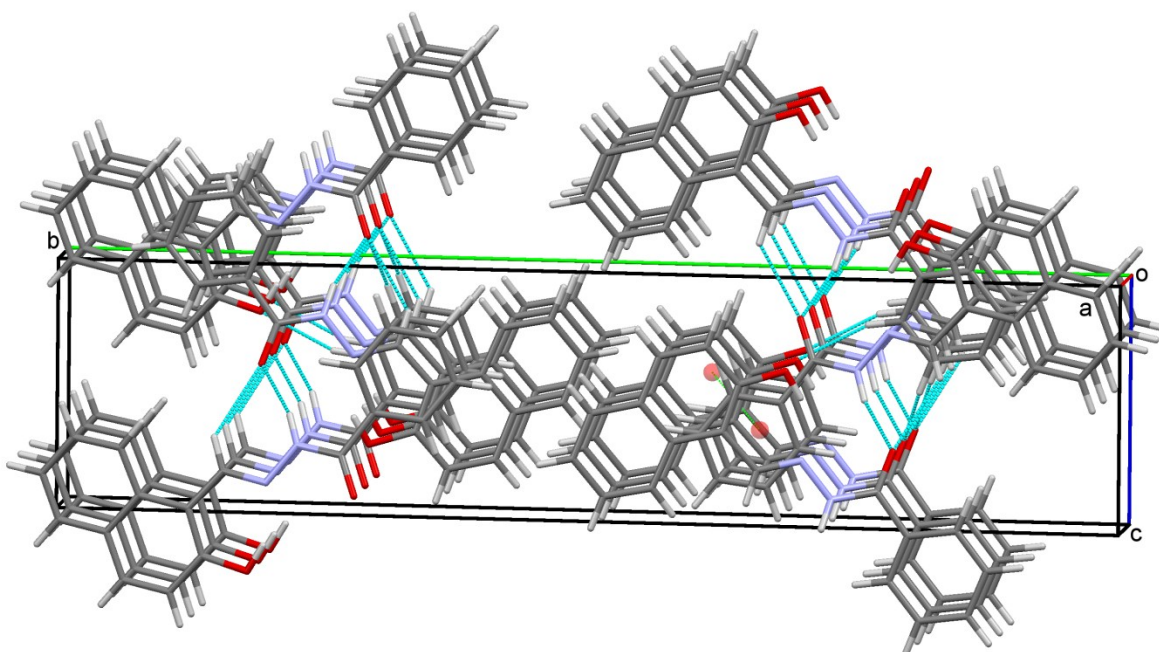

**Fig. S1.** Overall packing for **HL** viewed along the *a* axis direction. Hydrogen bonds are drawn as dashed blue lines and a representative  $\pi \dots \pi$  contact is shown as a dotted green line. Representative ring centroids are shown as red spheres.

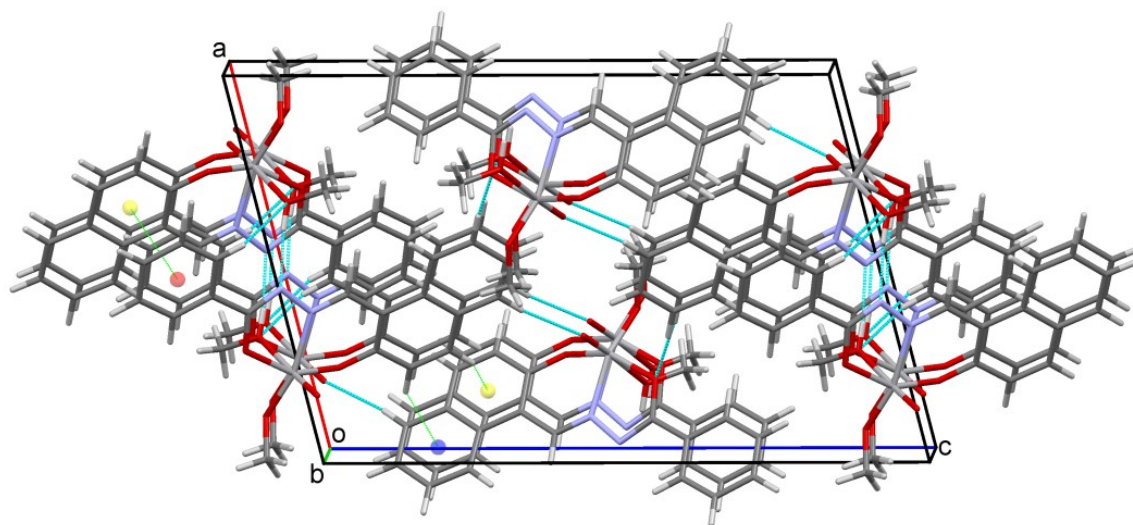

**Fig. S2.** Overall packing for [VO(L)(MeOH)(OMe)] viewed along the *b* axis direction. Hydrogen bonds are drawn as dashed blue lines and representative  $\pi \dots \pi$  and C—H... $\pi$  contacts are shown as green dotted lines.

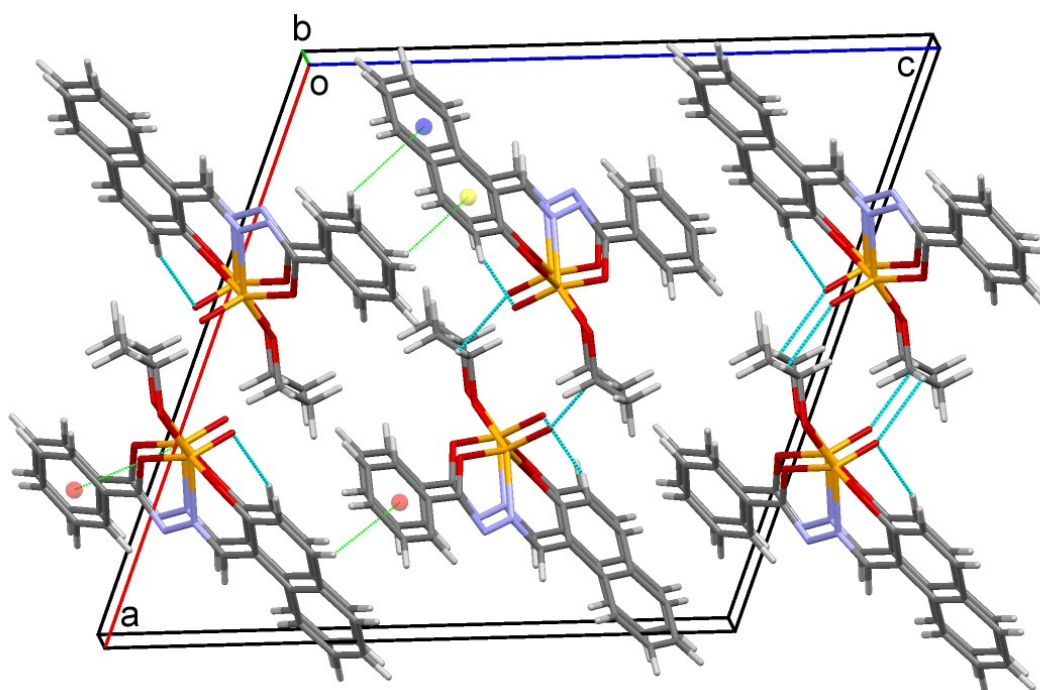

**Fig. S3.** Overall packing for [VO(L)(OEt)] viewed along the *b* axis direction. Hydrogen bonds are drawn as dashed blue lines and representative C—H... $\pi$  and V... $\pi$  contacts are shown as dotted green lines. Representative ring centroids are shown as coloured spheres.

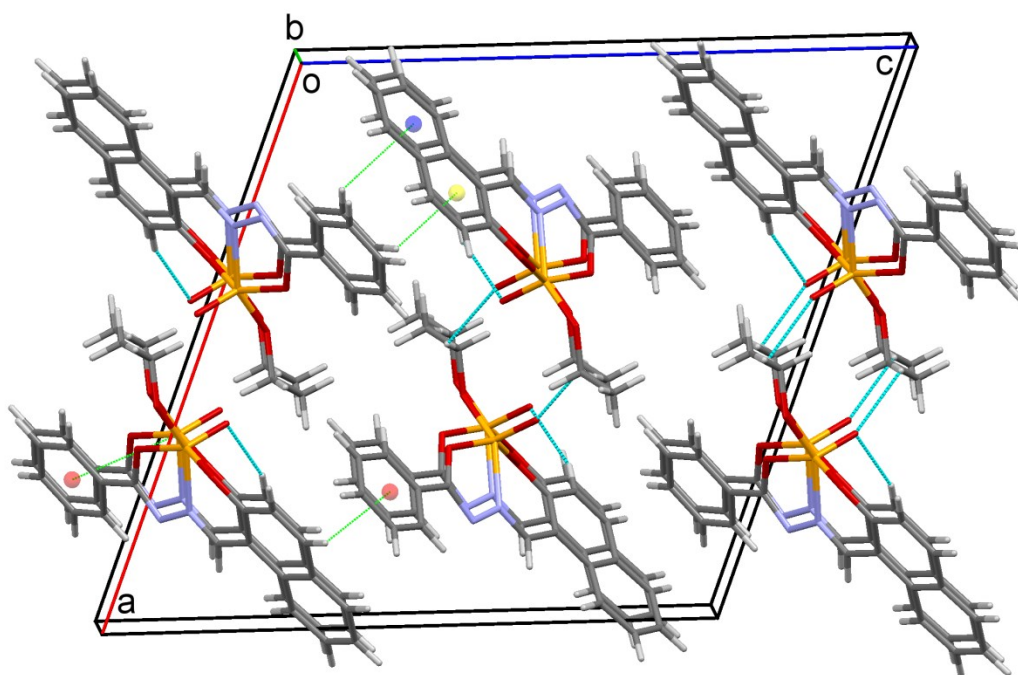

**Fig. S4.** Overall packing for [VO(L)(OPr)] viewed along the *b* axis direction. Hydrogen bonds are drawn as dashed blue lines and representative C—H... $\pi$  and V... $\pi$  contacts are shown as dotted green lines. Representative ring centroids are shown as coloured spheres.

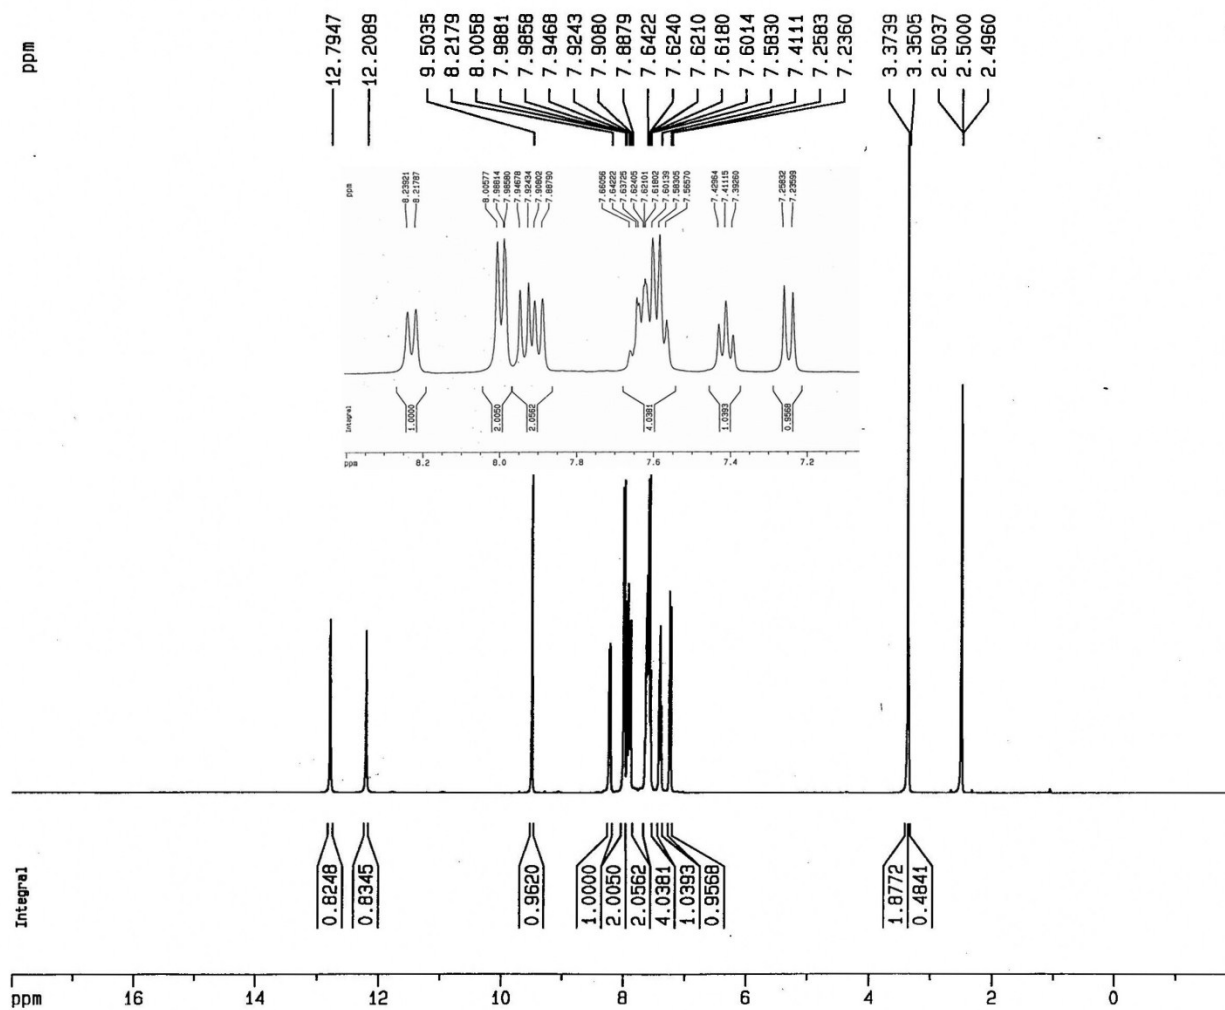

Fig. S5. <sup>1</sup>H NMR spectrum of HL.

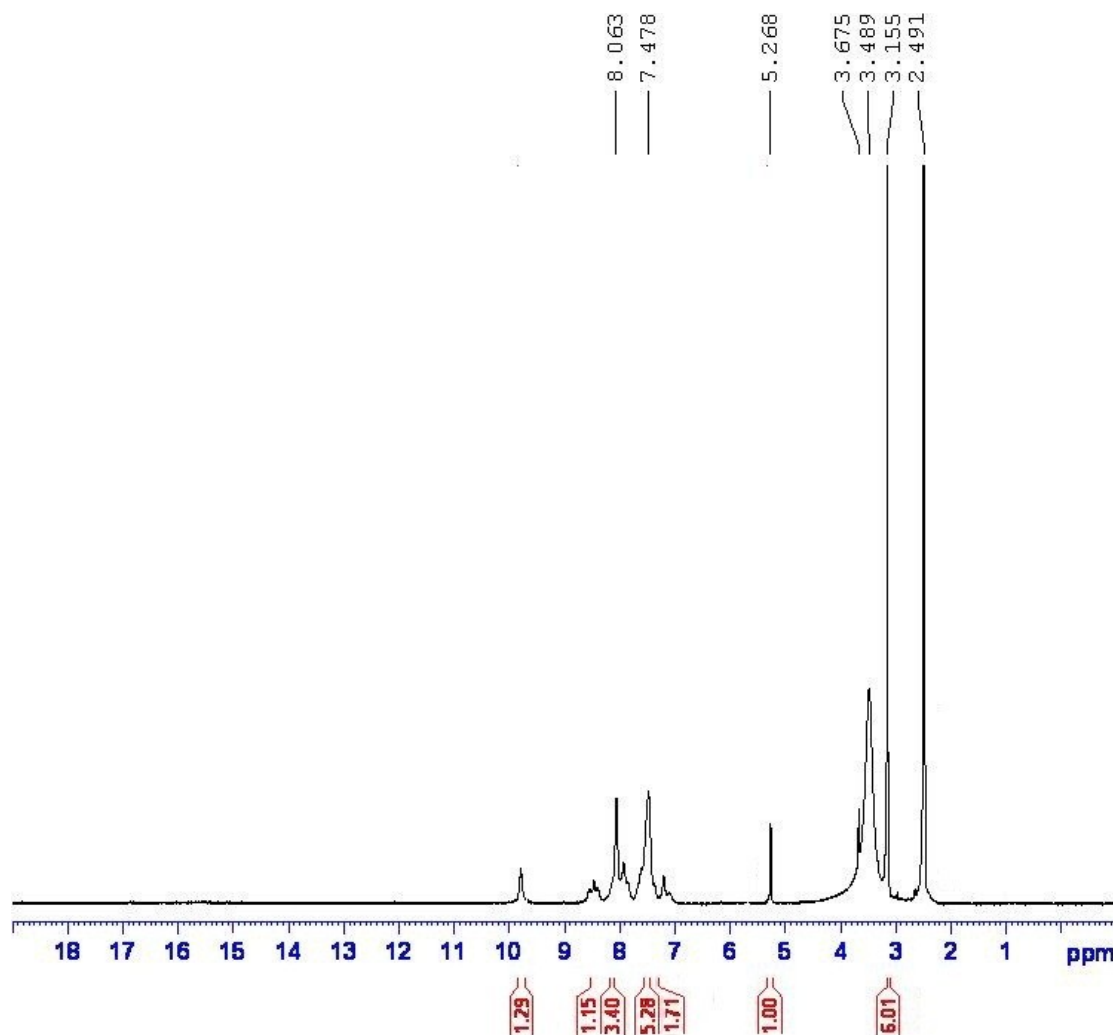

**Fig. S6.** <sup>1</sup>H NMR spectrum of [VO(L)(MeOH)(OMe)].

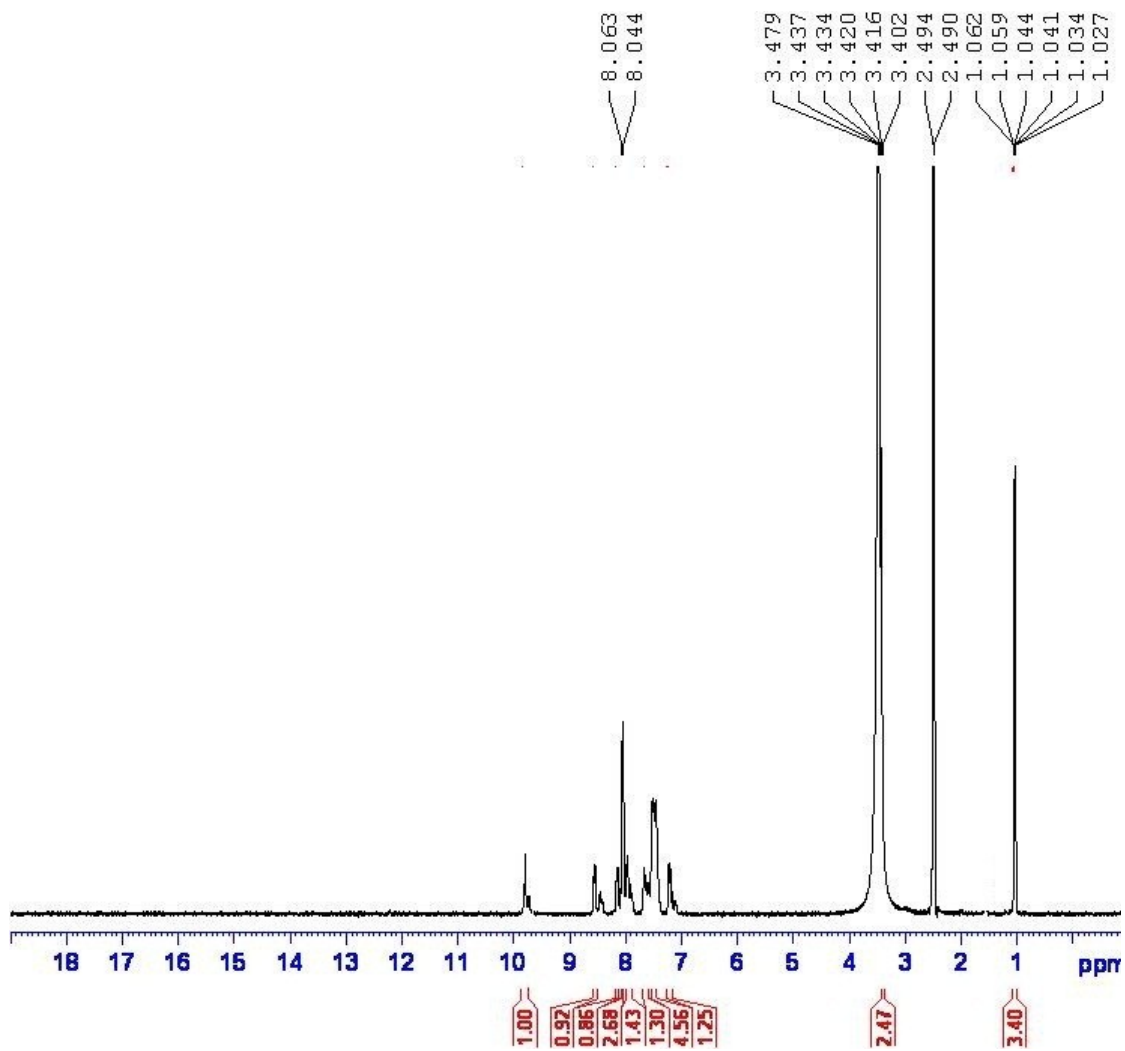

Fig. S7. <sup>1</sup>H NMR spectrum of [VO(L)(OEt)].

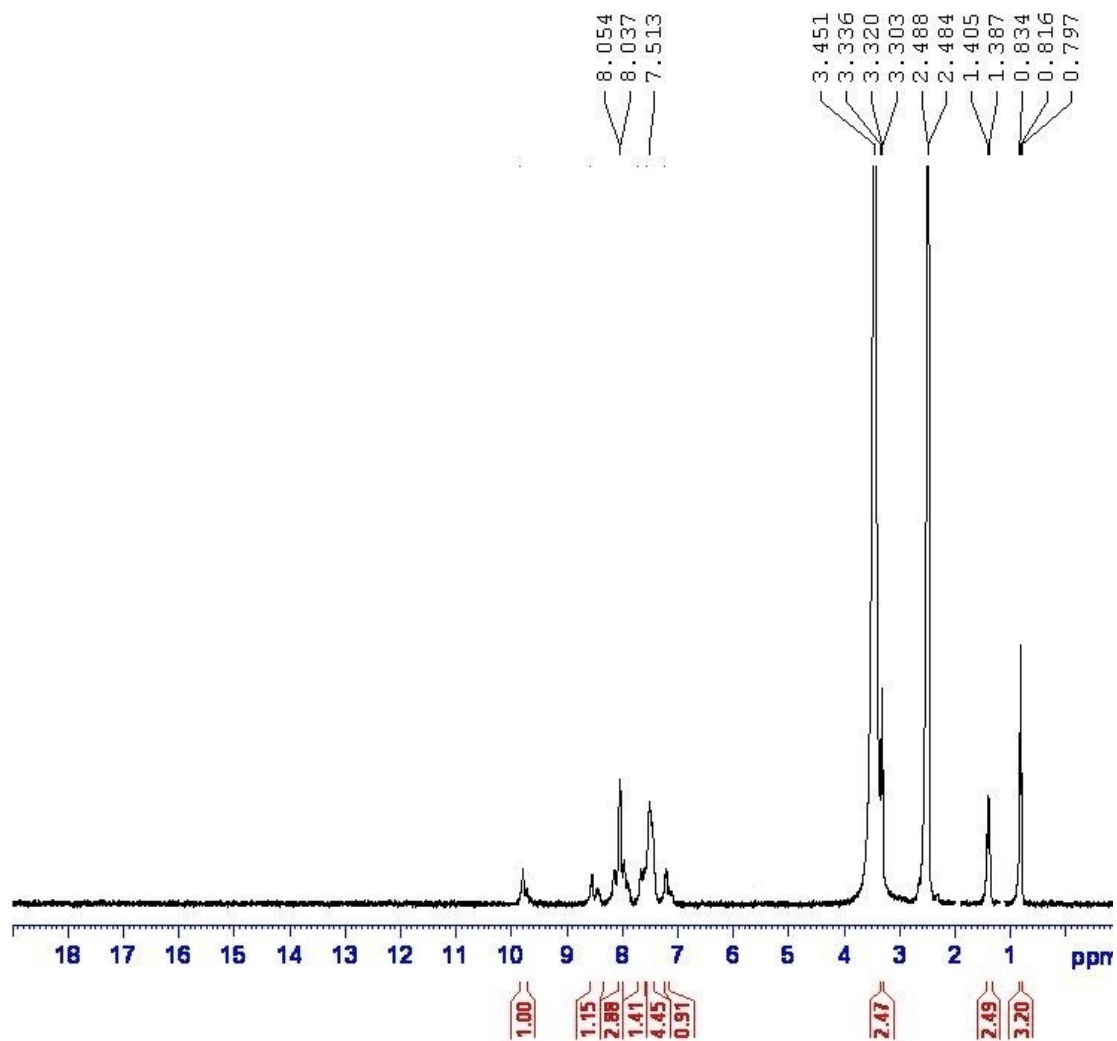

Fig. S8.  $^1\text{H}$  NMR spectrum of  $[\text{VO}(\text{L})(\text{OPr})]$ .



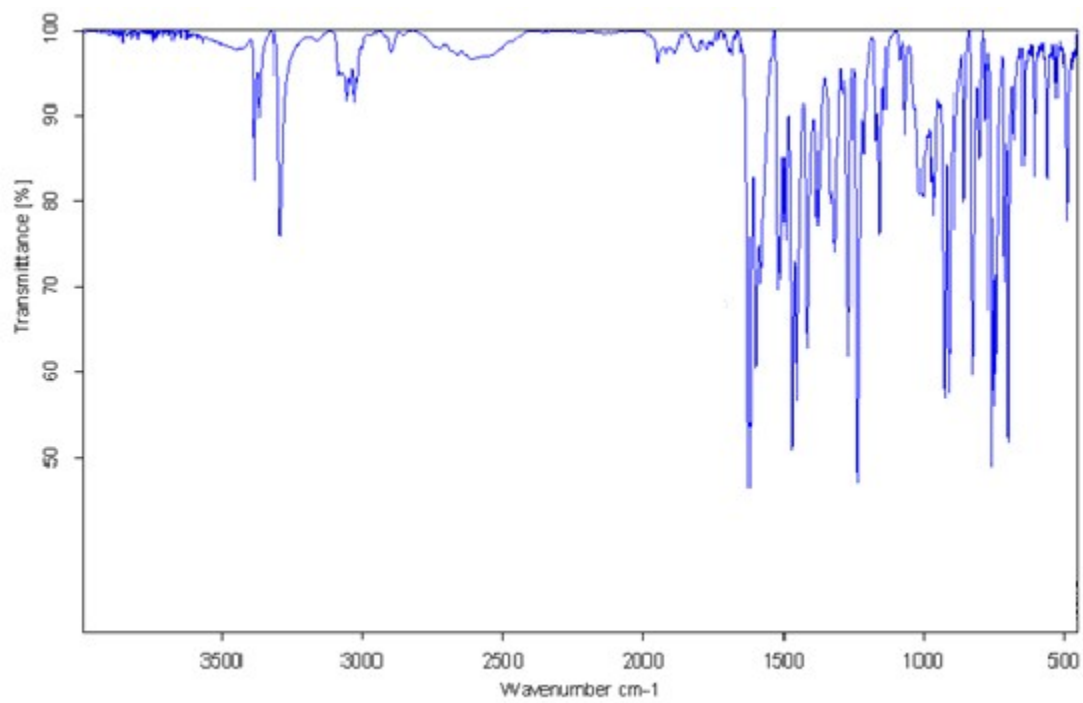

**Fig. S9.** FT-IR spectrum of [H<sub>2</sub>L].

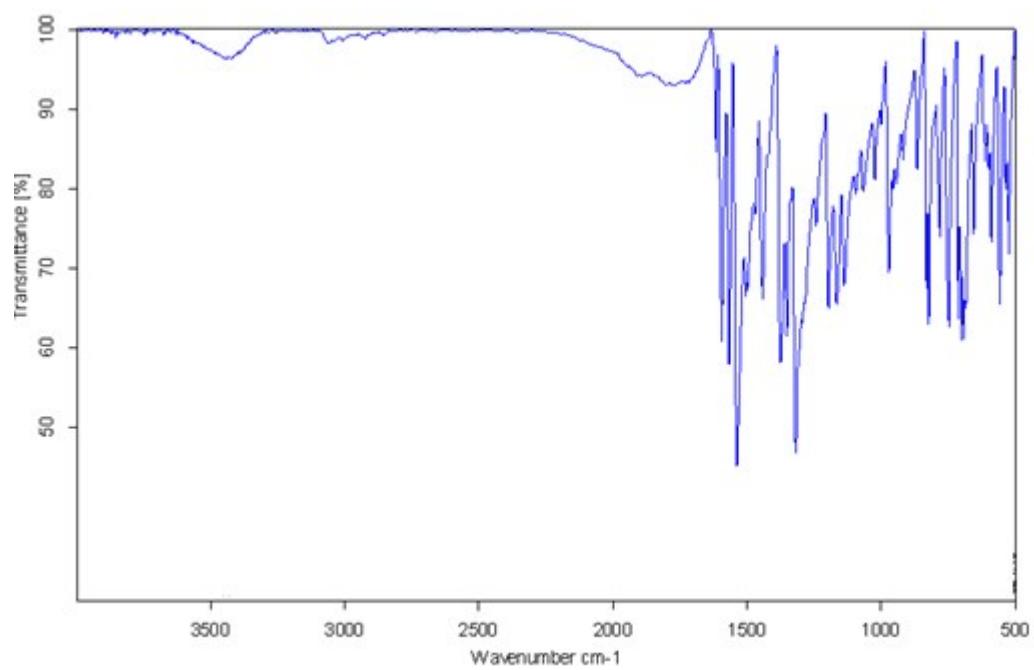

**Fig. S10.** FT-IR spectrum of [VO(L)(MeOH)(OMe)].

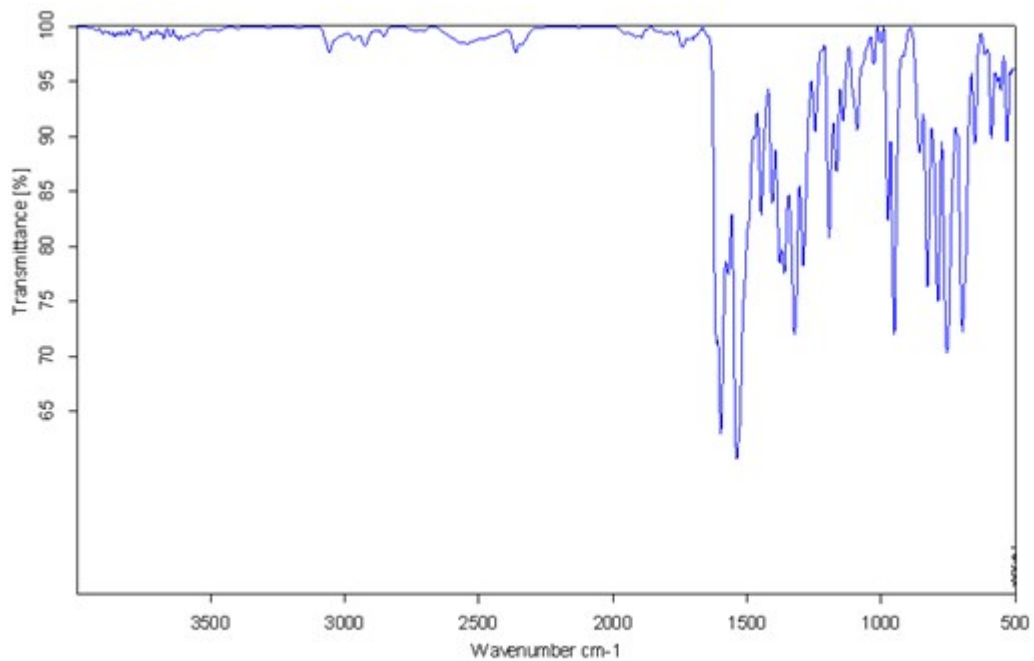

**Fig. S11.** FT-IR spectrum of [VO(L)(OEt)].

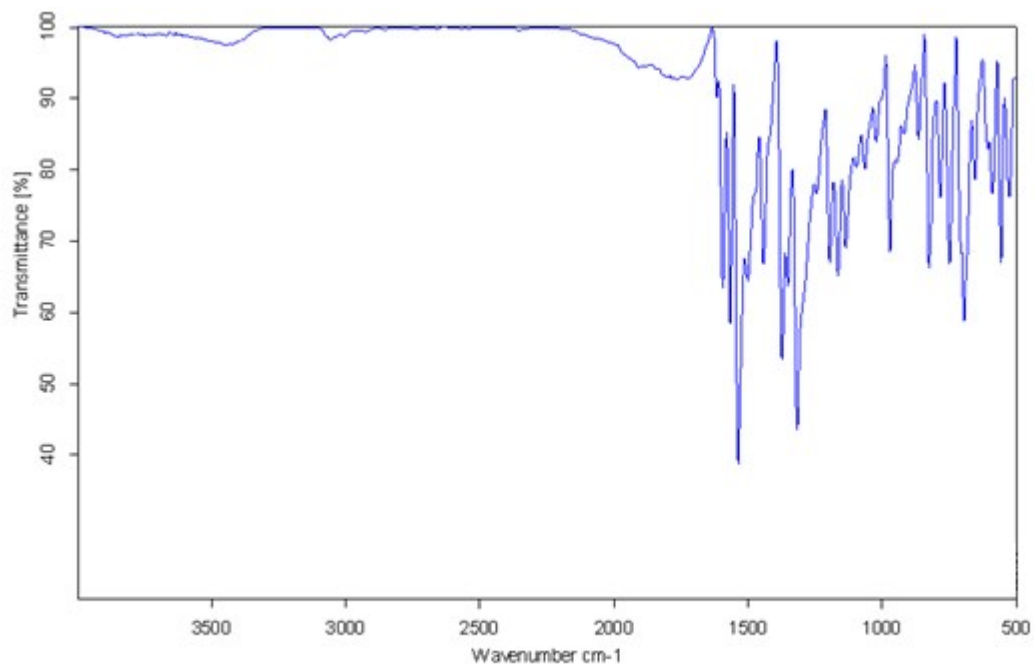

**Fig. S12.** FT-IR spectrum of [VO(L)(OPr)].
